# Supplementary material for: Rotational thromboelastometry alongside conventional coagulation testing in patients with Crimean–Congo haemorrhagic fever: an observational cohort study
Source: PubMed Central journal article supplement (PMC7641897; doi:10.1016/s1473-3099(19)30112-4), 2019-08
Supplement: mmc1.pdf [file mmc1.pdf]

# THE LANCET Infectious Diseases

## Supplementary webappendix

This webappendix formed part of the original submission and has been peer reviewed.  
We post it as supplied by the authors.

Supplement to: Fletcher TE, Leblebicioglu H, Bozkurt I, et al.  
Rotational thromboelastometry alongside conventional coagulation testing in  
patients with Crimean–Congo haemorrhagic fever: an observational cohort study.  
*Lancet Infect Dis* 2019; published online June 28. [http://dx.doi.org/10.1016/S1473-3099\(19\)30112-4](http://dx.doi.org/10.1016/S1473-3099(19)30112-4).

## Geographic distribution of Crimean-Congo Haemorrhagic Fever

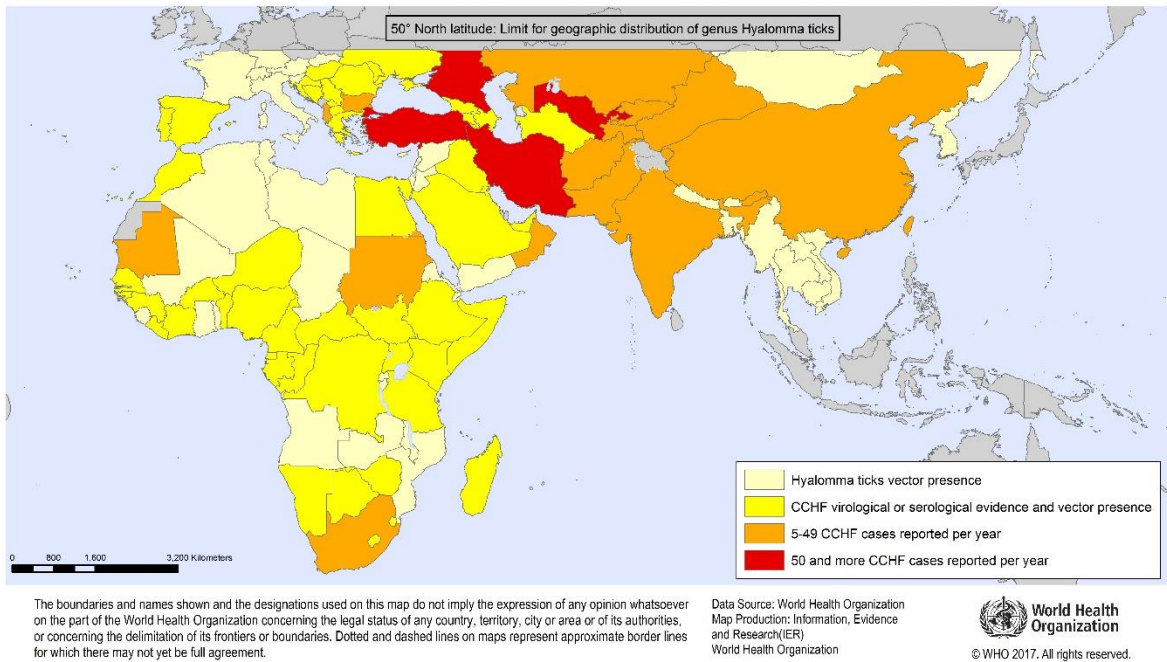

Supplementary figure 1. Geographic distribution of CCHF (reproduced with permission WHO).

**Clotting time vs prothrombin time**

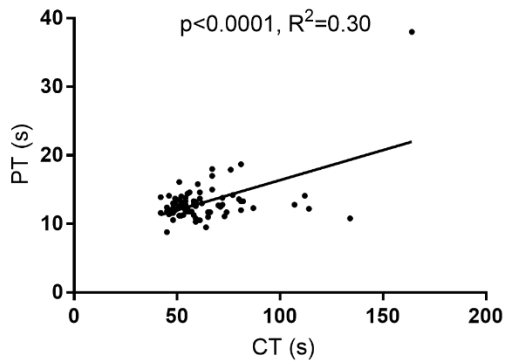

**Amplitude 10 min vs platelet count**

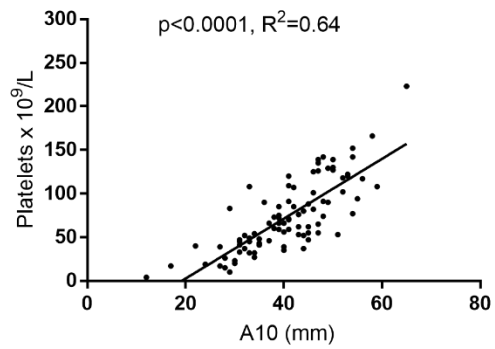

**Clot formation time vs platelet count**

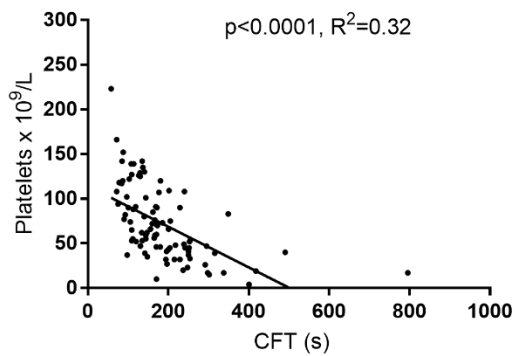

**Maximal clot firmness vs platelet count**

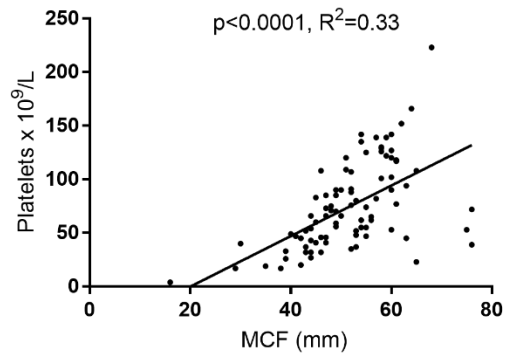

**PLTEM vs platelet count**

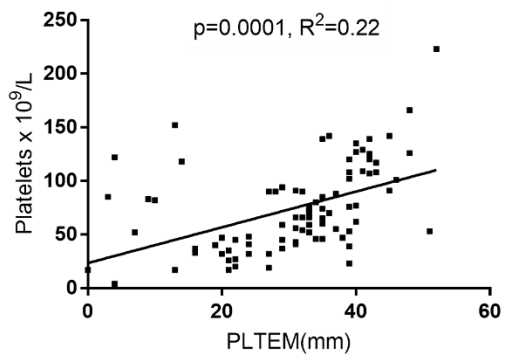

Supplementary figure 2: ROTEM and conventional coagulation/haematology correlations

| <b>Swanepoel criteria</b>                                                                                                                         | <b>Severity grading system</b>                                                                                                                                           | <b>Severity scoring index</b>                                                                                                        |
|---------------------------------------------------------------------------------------------------------------------------------------------------|--------------------------------------------------------------------------------------------------------------------------------------------------------------------------|--------------------------------------------------------------------------------------------------------------------------------------|
| <ul style="list-style-type: none"> <li>- 1<sup>st</sup> 5 days of illness</li> <li>- Any of following &gt;90% predictive fatal outcome</li> </ul> | <ul style="list-style-type: none"> <li>- 1<sup>st</sup> 5 days of illness</li> <li>- 0-4 Low risk</li> <li>- 5-8 Intermediate risk</li> <li>- &gt;9 High risk</li> </ul> | <ul style="list-style-type: none"> <li>- At admission</li> <li>- 0-2 Mild</li> <li>- 3-9 Moderate</li> <li>- 10-13 Severe</li> </ul> |
| Platelet count $\leq 20 \times 10^9 /L$                                                                                                           | Platelet count<br>$\geq 100,000$ cells/ $\mu L$ = 0<br>$\geq 50,000$ , <100,000 cells/ $\mu L$ = 1<br><50,000 cells/ $\mu L$ = 2                                         | Platelet count ( $\times 10^3/mm^3$ )<br>>150 = 0<br>150–50 = 1<br>49–20 = 2<br><20 = 3                                              |
| APTT $\geq 60$ seconds                                                                                                                            | aPTT (seconds)<br><70 = 0<br>$\geq 70$ = 1                                                                                                                               | aPTT (seconds)<br>$\leq 34$ = 0<br>35–45 = 1<br>46–59 = 2<br>>60 = 3                                                                 |
| Aspartate transaminase $\geq 200$ U/L                                                                                                             | Aspartate transaminase<br>< 5 $\times$ ULNV = 0<br>$\geq 5\times$ ULNV = 1<br>Lactate dehydrogenase<br><3 $\times$ ULNV = 0<br>$\geq 3\times$ ULNV = 1                   | Fibrinogen level, mg/dL<br>$\geq 180$ = 0<br>179–160 = 1<br>159–120 = 2<br><120 = 3                                                  |
| Alanine transaminase $\geq 150$ U/L                                                                                                               | Alanine transaminase<br><ULNV = 0<br>$\geq$ ULNV = 1                                                                                                                     | Bleeding<br>No = 0<br>Petechia = 1<br>Ecchymosis = 2<br>Bleeding = 3                                                                 |
| White blood cells $\geq 10,000$ cells/ $\mu L$                                                                                                    | White blood cells<br><10,000 cells / $\mu L$ = 0<br>$\geq 10,000$ cells / $\mu L$ = 1                                                                                    | Somnolence<br>No = 0<br>Yes = 1                                                                                                      |
| Fibrinogen $\geq 110$ mg/dL.                                                                                                                      | Organ failure<br>No = 0<br>Yes = 1                                                                                                                                       |                                                                                                                                      |
|                                                                                                                                                   | Bleeding<br>No = 0<br>Yes = 1                                                                                                                                            |                                                                                                                                      |
|                                                                                                                                                   | Age<br><60 = 0<br>>60 = 1                                                                                                                                                |                                                                                                                                      |
|                                                                                                                                                   | Prolongation of PT<br><3 s = 0<br>$\geq 3s$ , <6 s = 1<br>$\geq 6s$ = 2                                                                                                  |                                                                                                                                      |
|                                                                                                                                                   | Hepatomegaly<br>No = 0<br>Yes = 1                                                                                                                                        |                                                                                                                                      |
|                                                                                                                                                   | INR<br><1.6 = 0<br>$\geq 1.6$ = 1                                                                                                                                        |                                                                                                                                      |

Supplementary Table 1: CCHF severity scoring systems

| ROTEM parameter                                                 |               | Acute<br>Day 1-3   | Acute<br>Day 4-6   | Acute<br>Day 7-10  | p-value | Acute<br>all       | Convalescent<br>Day 14-30 | p-value |
|-----------------------------------------------------------------|---------------|--------------------|--------------------|--------------------|---------|--------------------|---------------------------|---------|
| EXTEM S CT (n=107)                                              | Mean (95% CI) | 61.0 (55.8 : 66.2) | 64.1 (56.5 : 71.6) | 59.7 (52.1 : 67.3) | 0.686   | 62.1 (57.6 : 66.6) | 50.7 (47.0 : 54.3)        | <0.001  |
| 38-79                                                           | n             | 24                 | 38                 | 21                 |         | 83                 | 13                        |         |
| >79                                                             | n             | 2                  | 6                  | 3                  |         | 11                 | 0                         |         |
| EXTEM S A10 (n=107)                                             | Mean (95% CI) | 42.5 (39.0 : 46.1) | 37.9 (34.6 : 41.2) | 42.6 (38.3 : 46.9) | 0.090   | 40.4 (38.3 : 42.5) | 62.9 (58.3 – 67.5)        | <0.001  |
| 43-65                                                           | n             | 11                 | 15                 | 13                 |         | 39                 | 13                        |         |
| <43                                                             | n             | 15                 | 29                 | 11                 |         | 55                 | 0                         |         |
| EXTEM S CFT (n=107)                                             | Mean (95% CI) | 168 (137 : 200)    | 210 (169 : 250)    | 155 (124 : 187)    | 0.097   | 184 (161 : 207)    | 71 (55 : 88)              | <0.001  |
| 34 - 159 (normal range)                                         | n             | 10                 | 18                 | 15                 |         | 43                 | 13                        |         |
| 160 - 220 (usually unimpaired haemostasis with reduced reserve) | n             | 12                 | 10                 | 5                  |         | 27                 | 0                         |         |
| 221 - 300 (bleeding risk)                                       | n             | 3                  | 10                 | 3                  |         | 16                 | 0                         |         |
| 300 - 400 (high bleeding risk)                                  | n             | 0                  | 3                  | 1                  |         | 4                  | 0                         |         |
| >400 (usually no effective haemostasis)                         | n             | 1                  | 3                  | 0                  |         | 4                  | 0                         |         |
| EXTEM S MCF (n=102)                                             | Mean (95% CI) | 52.3 (48.7 : 55.9) | 48.7 (45.2 : 52.2) | 55.5 (52.2 : 58.8) | 0.024   | 51.5 (49.4 : 53.5) | 68.5 (64.8 : 72.3)        | <0.001  |
| >50 (normal range)                                              | n             | 13                 | 22                 | 16                 |         | 47                 | 13                        |         |
| 46-49 (usually unimpaired haemostasis with reduced reserve)     | n             | 9                  | 5                  | 2                  |         | 16                 | 0                         |         |
| 40-45 (bleeding risk)                                           | n             | 3                  | 9                  | 4                  |         | 16                 | 0                         |         |
| 30-40 (high bleeding risk)                                      | n             | 1                  | 4                  | 1                  |         | 6                  | 0                         |         |
| <30 (usually no effective haemostasis)                          | n             | 0                  | 2                  | 0                  |         | 4                  | 0                         |         |
| EXTEM S LI60 (n=93)                                             | Mean (95% CI) | 95.0 (93.6 : 96.4) | 97.9 (96.9 : 98.8) | 96.4 (94.4 : 98.4) | <0.001  | 96.7 (95.8 : 97.7) | 94.8 (93.6 : 96.0)        | 0.021   |
| <15% (normal range)                                             | n             | 22                 | 40                 | 19                 |         | 81                 | 12                        |         |
| >15%                                                            | n             | 0                  | 0                  | 0                  |         | 0                  | 0                         |         |
| FIBTEM S A10 (n=105)                                            | Mean (95% CI) | 12.7 (11.6 : 13.9) | 14.1 (12.6 : 15.7) | 16.2 (14.6 : 17.8) | 0.003   | 14.3 (13.3 : 15.3) | 16.8 (13.5 : 20.1)        | 0.146   |
| >7 (normal range 7-23)                                          | n             | 24                 | 43                 | 24                 |         | 91                 | 13                        |         |
| <7                                                              | n             | 1                  | 0                  | 0                  |         | 1                  | 0                         |         |
| FIBTEM S MCF (n=105)                                            | Mean (95% CI) | 17.0 (13.1 : 20.9) | 20.2 (16.9 : 23.5) | 23.8 (19.8 : 27.7) | 0.082   | 20.3 (18.0 : 22.5) | 22.4 (13.4 : 31.3)        | 0.650   |
| >9 (normal range 9-25)                                          | n             | 24                 | 42                 | 24                 |         | 90                 | 13                        |         |
| <9                                                              | n             | 1                  | 1                  | 0                  |         | 2                  | 0                         |         |

Supplementary Table 2. ROTEM Thromboelastometry data by grouped day of acute illness and acute vs convalescent samples

95%CI: 95% confidence interval
